# Supplementary figures and images for: A shared MHC supertype motif emerges by convergent evolution in macaques and mice, but is totally absent in human MHC molecules
Source: PubMed Central journal article supplement — Immunogenetics. 2012 Feb 10;64(6):421–34. doi: 10.1007/s00251-011-0598-5 (PMC3349854; doi:10.1007/s00251-011-0598-5), 2012-02-10

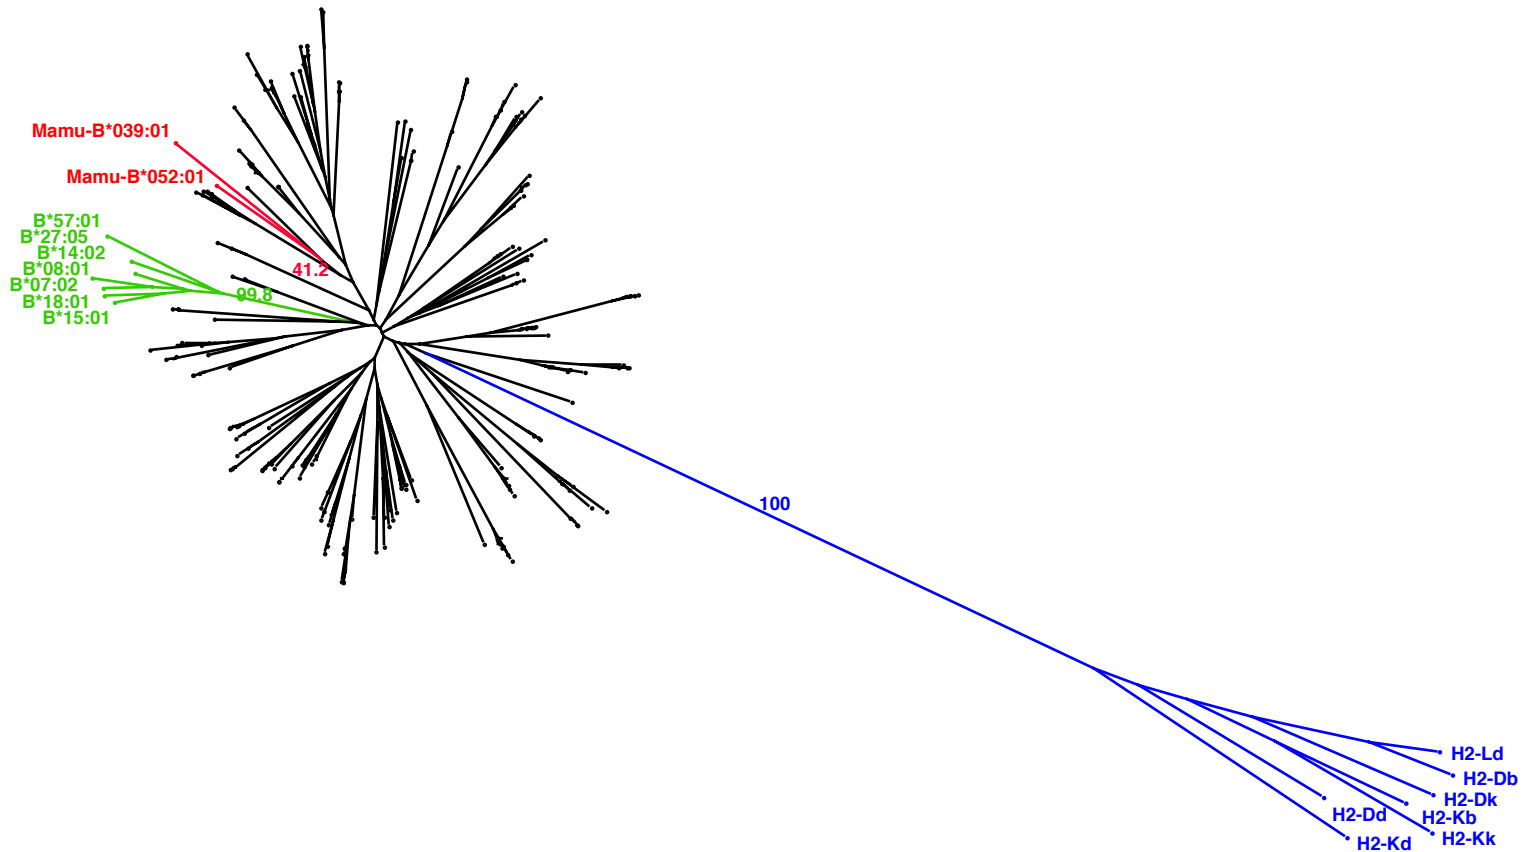

Supplement: 251_2011_598_MOESM1_ESM.pdf [file 251_2011_598_MOESM1_ESM.pdf]
